# Supplementary material for: Novel Functionalized Spiro [Indoline-3,5′-pyrroline]-2,2′dione Derivatives: Synthesis, Characterization, Drug-Likeness, ADME, and Anticancer Potential
Source: MDPI journal article supplement (doi:10.3390/ijms24087336), 2023-04-15
Supplement: s1 [file s1]

## Supplementary Material

### Novel functionalized spiro [indoline-3, 5'-pyrroline]-2, 2'dione derivatives: Synthesis, characterization, drug-likeness, ADME, and anti-cancer potential

Mohd Asif<sup>1</sup>, Sahir Sultan Alvi<sup>2</sup>, Tazeen Azaz<sup>3</sup>, Abdul Rahman Khan<sup>1</sup>, Bhoopendra Tiwari<sup>3</sup>, Bilal Bin Hafeez<sup>2,\*</sup> and Malik Nasibullah<sup>1,\*</sup>

<sup>1</sup> Department of Chemistry, Integral University, Lucknow, 226026, U.P., India.; [machem86@gmail.com](mailto:machem86@gmail.com) (M.A.); [arahman@iul.ac.in](mailto:arahman@iul.ac.in) (A.R.K.)

<sup>2</sup> Department of Immunology and Microbiology, South Texas Center of Excellence in Cancer Research, School of Medicine, University of Texas Rio Grande Valley, McAllen, 78504, Texas (TX), USA; [sahir.alvi@utrgv.edu](mailto:sahir.alvi@utrgv.edu) (S.S.A.)

<sup>3</sup> Department of Biological and Synthetic Chemistry, Centre of Biomedical Research, SGPGIMS-Campus, Raebareli Road, Lucknow 226014, U.P., India; [tazeen0@gmail.com](mailto:tazeen0@gmail.com) (T.A.); [btiwari@cbmr.res.in](mailto:btiwari@cbmr.res.in) (B.T.)

\* Correspondence: [malik7860@gmail.com](mailto:malik7860@gmail.com) (M.N.); Tel.: M. N.: +91-9919695886 (M.N.); [bilal.hafeez@utrgv.edu](mailto:bilal.hafeez@utrgv.edu) (B.B.H.); Tel.: +1(901)-608-2182 (B. B. H.)

## Materials and Methods

The reaction was initiated by mixing isatin(1mM), 4-chloro-3-(trifluoromethyl)aniline (1mM), and dimethyl acetylenedicarboxylate (1mM) in 5 mL of different solvents (*i.e.*, ethanol, MeOH, EtOAc, acetone, DMSO, and isopropanol) in the presence of *p*-TSA (0.0, 0.25, 0.50 and 0.75 mM; catalyst) followed by stirring the mixture at room temperature for varying durations (6-16 h) (Scheme 1). Following the designated optimization steps with above-mentioned three components, the concentrated precipitates were collected and washed with respective solvent in order to obtain pure compounds devoid of *p*-TSA. On the basis of the findings from these optimizations hits, we concluded that the optimal conditions for the synthesis of the novel spirooxindole pyrrolines (4a) were; *p*-TSA: 0.5 mM and solvent: EtOH. The rest of the compounds (4b-h) were synthesized by using distinct isatin derivatives, aryl amine derivatives and dimethyl acetylenedicarboxylate (remained constant) in presence of 0.5 mM *p*-TSA and ethanol at RT.

### *Apparatus used for the characterization*

The melting point of all the synthesized compounds was determined with the help of open capillary tube method using IA 9100 MK-Digital uncorrected melting Point analyzer Griffin Apparatus at Department of Chemistry, Integral University. Infrared Spectroscopic analysis was done on Agilent Cary 630 FT-IR Spectrometer (Range: 4000-450 cm<sup>-1</sup>) Perkin-Elmer Spectrum version 10.03.06 at CSIR-CDRI, Lucknow and the spectra were expressed as wave number (cm<sup>-1</sup>) with KBr discs. <sup>1</sup>H NMR Spectra was determined using Advance-400 MHz Bruker, Switzerland and Bruker AVLL-300 MHz (Bruker, Switzerland) using DMSO-d<sub>6</sub> as a solvent. The chemical shifts were denoted by  $\delta$  ppm units using trimethylsilane as the internal standard. <sup>13</sup>C NMR spectra were recorded using Bruker AVLL-100 MHz (Bruker, Switzerland) using DMSO-d<sub>6</sub>. High Resolution Mass Spectra was taken on Acquisition SW-6200 series TOF, version Q-TOF B.05.00 at PGI-Lucknow. The completion of all the reactions was monitored with the help of thin layer chromatography (TLC) and using variable proportions of ethyl acetate and petroleum n-hexane. On the contrary, the purity of the synthesized compound which was used for in-vitro studies was assessed through the HPLC at Integral University, Lucknow. Briefly, 20  $\mu$ l SOX **4a** was analyzed using Shimadzu 20AD Gradient LC System with PDA Detector system. A C-18 column (4.6 mm $\times$ 250 mm, 5  $\mu$ m) was used to achieve the chromatographic separation. The mobile phase comprising of methanol: H<sub>2</sub>O (70:30, v/v) was applied at a flow rate of 0.5 ml/min. The SOX **4a** was detected at 254 nm with a retention time of 7.928 min in HPLC system thermo-stated at 25 °C.

HPLC data of methyl-1'-(4-chloro-3-(trifluoromethyl)phenyl)-4'-hydroxy-2,5'-dioxo-1',5'-dihydrospiro[indoline-3,2'-pyrrole]-3'-carboxylate (4a)

21-12-2022 15:00:33 Page 1 / 1

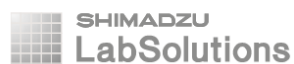

## Analysis Report

### <Sample Information>

Sample Name : 4A R2  
Sample ID : Chem  
Data Filename : 4A R2.lcd  
Method Filename : WM 1535 T2.lcm  
Batch Filename :  
Vial # : 1-1  
Injection Volume : 20 uL  
Date Acquired : 12/21/2022 2:07:24 PM  
Date Processed : 12/21/2022 2:42:27 PM

Sample Type : Unknown  
Acquired by : System Administrator  
Processed by : System Administrator

### <Chromatogram>

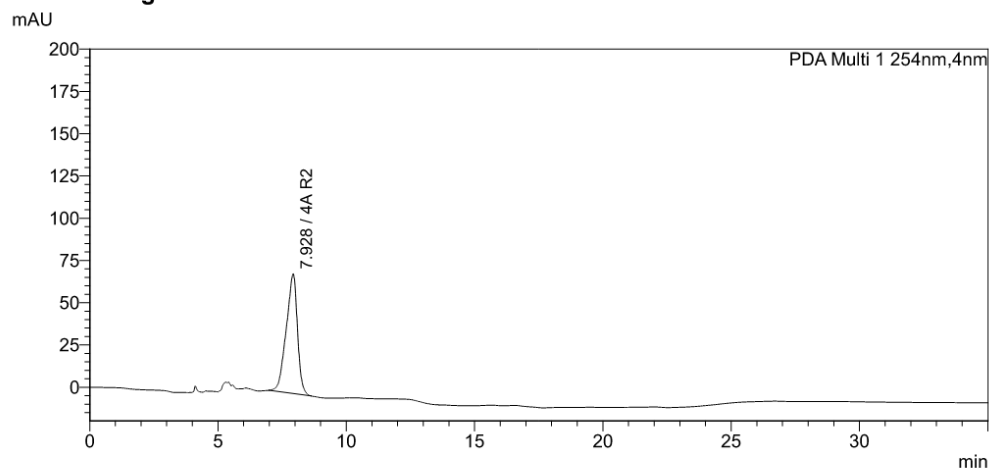

### <Peak Table>

PDA Ch1 254nm

| Peak# | Ret. Time | Area    | Height | Conc. | Unit | Mark | Name  |
|-------|-----------|---------|--------|-------|------|------|-------|
| 1     | 7.928     | 2157752 | 70910  | 0.000 | mg/L | M    | 4A R2 |
| Total |           | 2157752 | 70910  |       |      |      |       |

| USP Width | Lambda max          | Noise  | Tailing Factor |
|-----------|---------------------|--------|----------------|
| 0.821     | 254/328/199/218/425 | 225.09 | 0.846          |

## Copies of Characterization details (4a-h)

### FT-IR Spectra (4a)

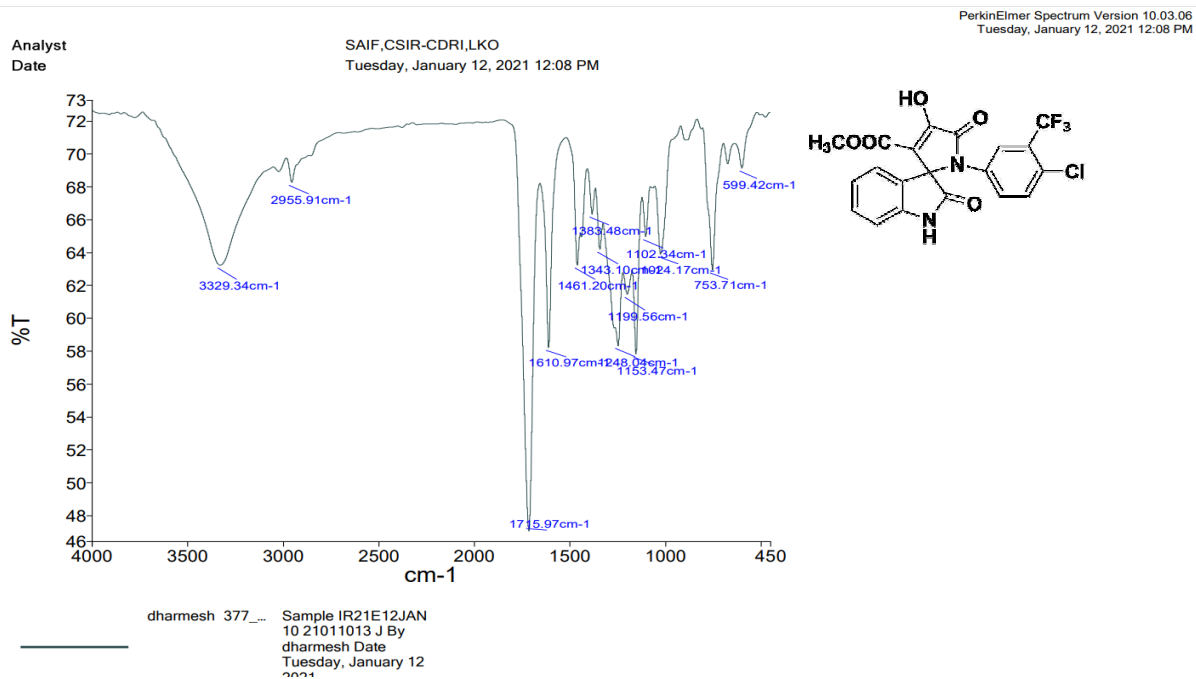



### <sup>13</sup>C NMR Spectra (4a)

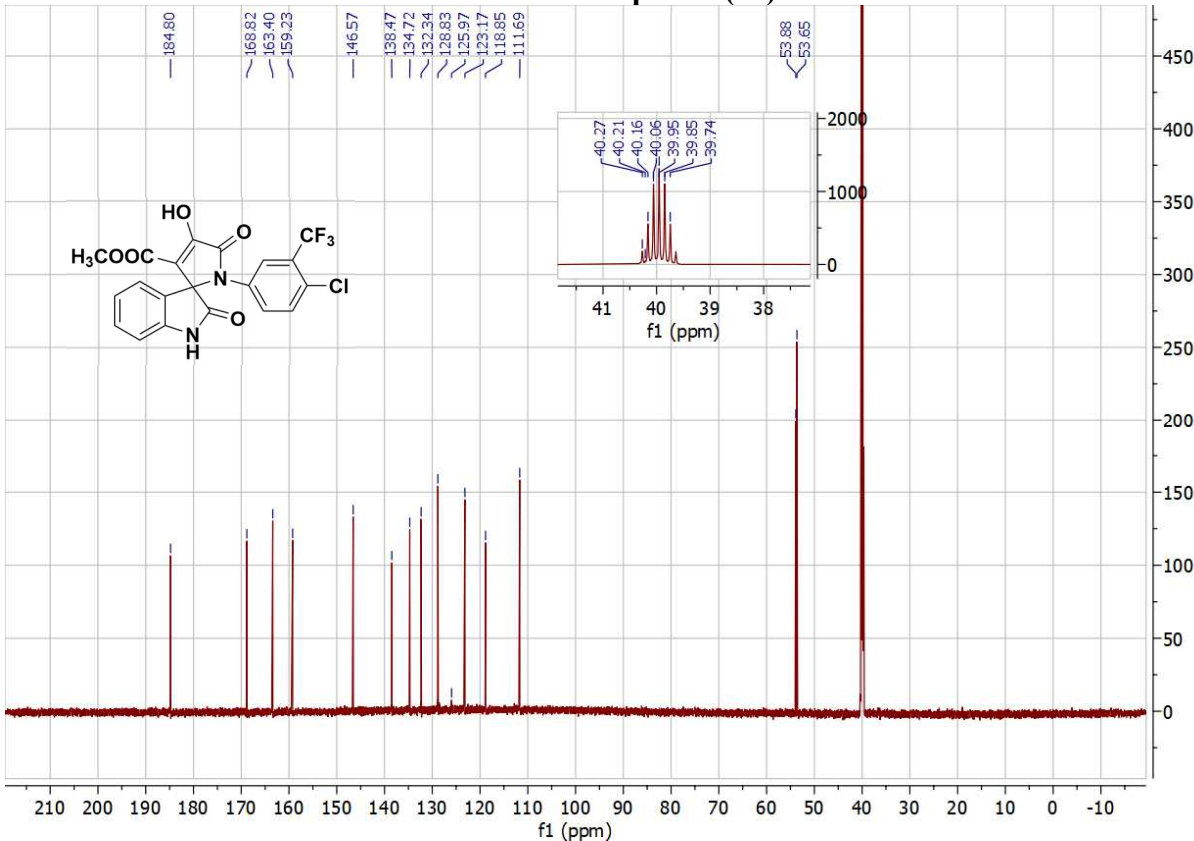

### <sup>1</sup>H NMR Spectra (4a)

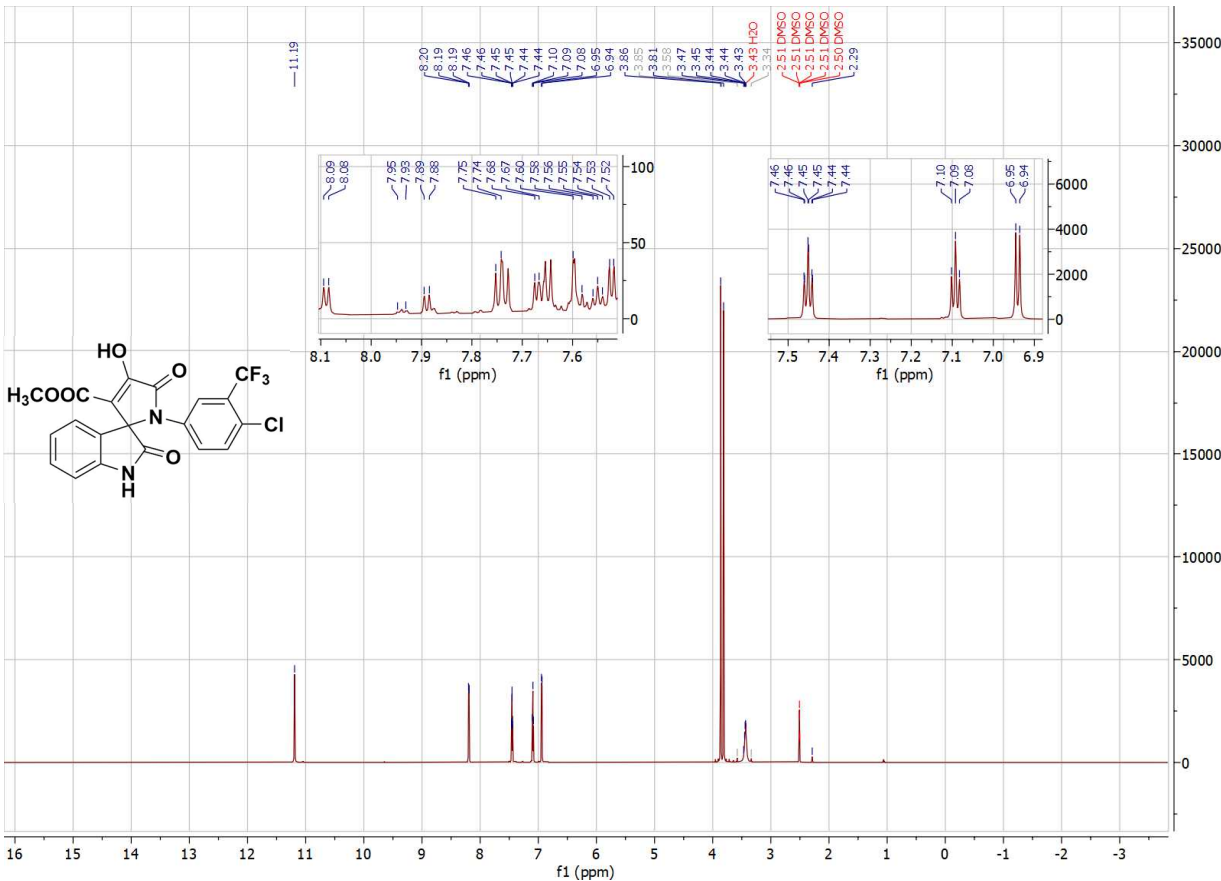

# HRMS (4a)

## Qualitative Analysis Report

|                               |                    |                      |                      |
|-------------------------------|--------------------|----------------------|----------------------|
| <b>Data Filename</b>          | TZ-3-J.d           | <b>Sample Name</b>   | TZ-3-J               |
| <b>Sample Type</b>            | Sample             | <b>Position</b>      | Vial 23              |
| <b>Instrument Name</b>        | Instrument 1       | <b>User Name</b>     |                      |
| <b>Acq Method</b>             | Direct Mass-2017.m | <b>Acquired Time</b> | 2/4/2021 10:14:55 PM |
| <b>IRM Calibration Status</b> | Some Ions Missed   | <b>DA Method</b>     | Default.m            |
| <b>Comment</b>                |                    |                      |                      |

|                       |                             |              |
|-----------------------|-----------------------------|--------------|
| <b>Sample Group</b>   |                             | <b>Info.</b> |
| <b>Acquisition SW</b> | 6200 series TOF/6500 series |              |
| <b>Version</b>        | Q-TOF B.05.00 (B5042.0)     |              |

### User Chromatograms

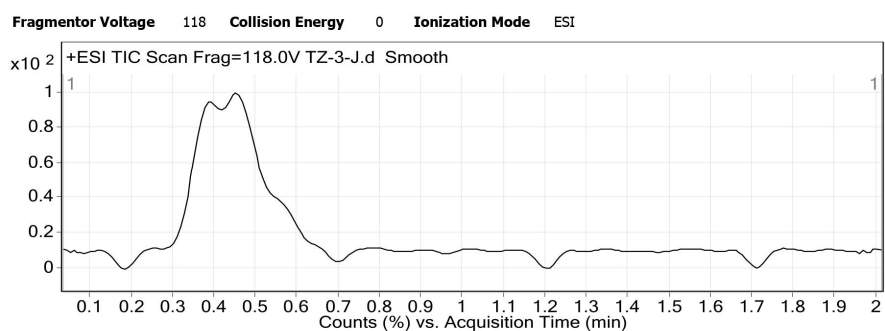

### User Spectra

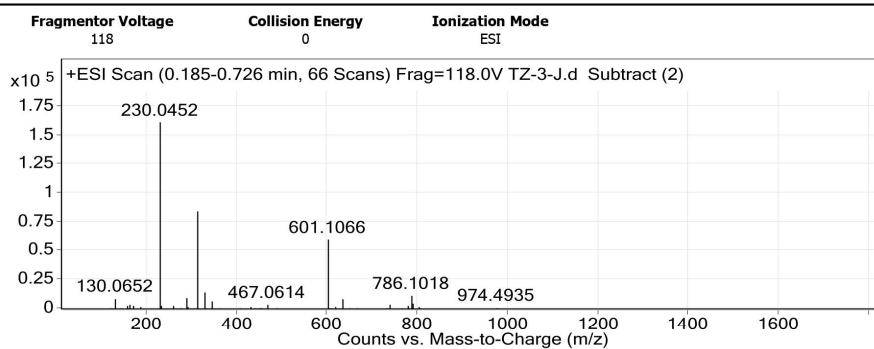

### Peak List

| m/z      | z | Abund     |
|----------|---|-----------|
| 130.0652 | 1 | 9179.41   |
| 230.0452 | 1 | 161993.55 |
| 231.0482 | 1 | 20138.81  |
| 290.0663 | 1 | 9690.5    |
| 312.0483 | 1 | 84380.41  |
| 313.0514 | 1 | 12547.83  |

## Qualitative Analysis Report

|          |   |          |
|----------|---|----------|
| 328.0221 | 1 | 14118.4  |
| 601.1066 | 1 | 59855.86 |
| 602.1097 | 1 | 18067.87 |
| 786.1018 | 1 | 11524.22 |

### Compounds

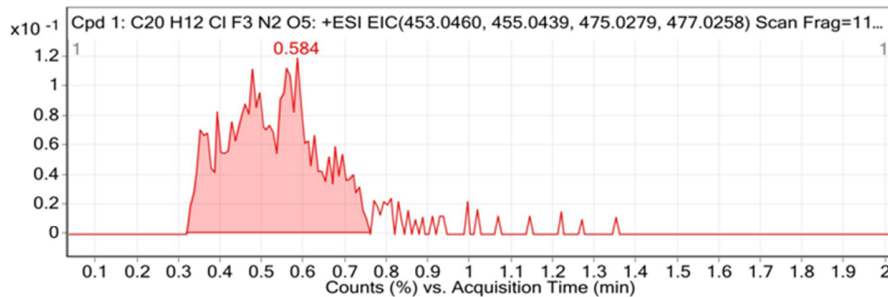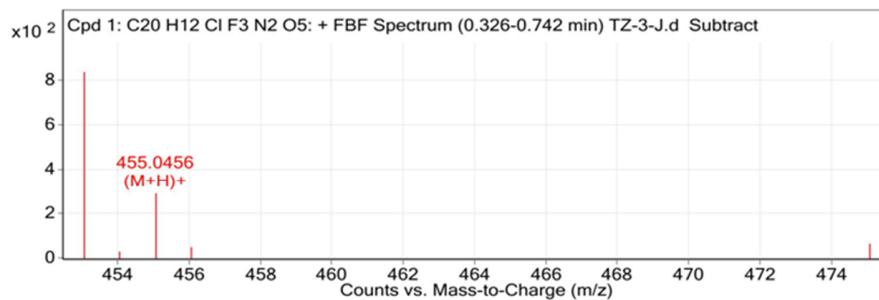

### Peak List

| m/z      | z | Abund  | Formula                                                                          | Ion     |
|----------|---|--------|----------------------------------------------------------------------------------|---------|
| 453.046  | 1 | 842.68 | C <sub>20</sub> H <sub>13</sub> ClF <sub>3</sub> N <sub>2</sub> O <sub>5</sub>   | (M+H)+  |
| 454.0439 | 1 | 36.8   | C <sub>20</sub> H <sub>13</sub> ClF <sub>3</sub> N <sub>2</sub> O <sub>5</sub>   | (M+H)+  |
| 455.0456 | 1 | 297.7  | C <sub>20</sub> H <sub>13</sub> ClF <sub>3</sub> N <sub>2</sub> O <sub>5</sub>   | (M+H)+  |
| 456.0508 | 1 | 55.77  | C <sub>20</sub> H <sub>13</sub> ClF <sub>3</sub> N <sub>2</sub> O <sub>5</sub>   | (M+H)+  |
| 475.0304 | 1 | 70.14  | C <sub>20</sub> H <sub>12</sub> ClF <sub>3</sub> N <sub>2</sub> NaO <sub>5</sub> | (M+Na)+ |

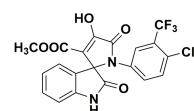

Chemical Formula: C<sub>20</sub>H<sub>12</sub>ClF<sub>3</sub>N<sub>2</sub>O<sub>5</sub>  
Molecular Weight: 453,  
HRMS (ESI-TOF m/z) = (M + H)<sup>+</sup>  
Calculated for C<sub>20</sub>H<sub>13</sub>ClF<sub>3</sub>N<sub>2</sub>O<sub>5</sub><sup>+</sup> 454.00784,  
Found 453.046; 454.0439; 455.0456; 456.0508;  
HRMS (ESI-TOF m/z) = (M + Na)<sup>+</sup>  
Calculated for C<sub>20</sub>H<sub>12</sub>ClF<sub>3</sub>N<sub>2</sub>NaO<sub>5</sub><sup>+</sup> 475.9897,  
Found 475.0304.

## FT-IR Spectra (4b)

PerkinElmer Spectrum Version 10.03.06  
Tuesday, January 12, 2021 12:06 PM

Analyst  
Date

SAIF,CSIR-CDRI,LKO  
Tuesday, January 12, 2021 12:06 PM

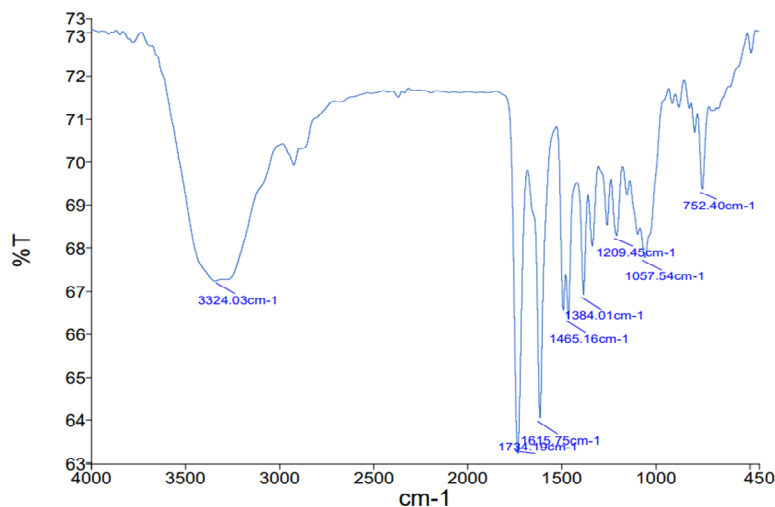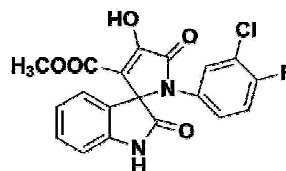

dharmesh 376... Sample  
IR21E12JAN 09  
21011013 I By  
dharmesh Date  
Tuesday, January 12  
2021

## <sup>1</sup>H NMR Spectra (4b)

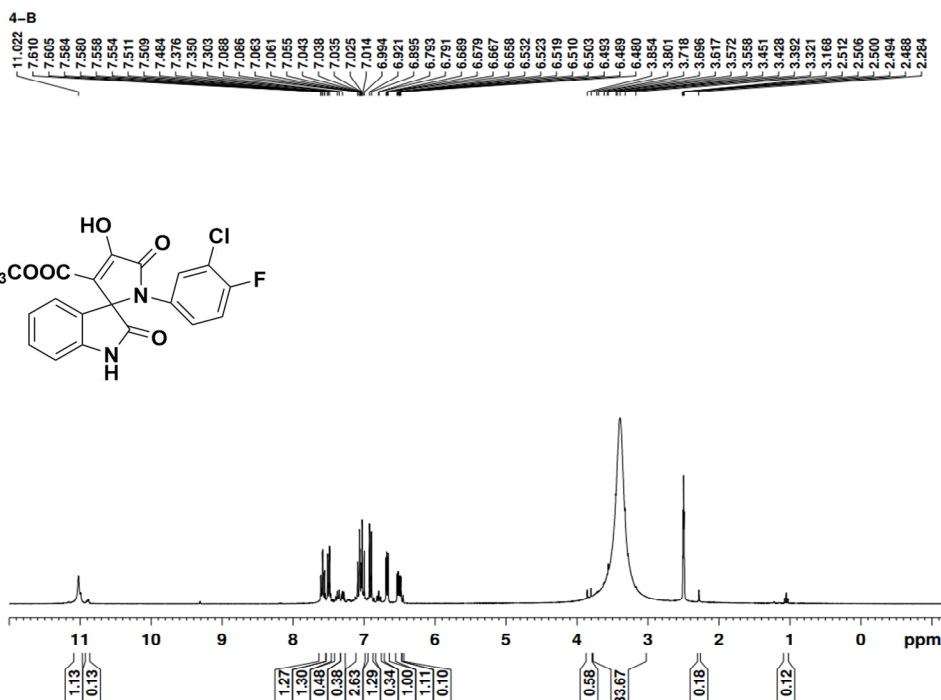

NAME 22012754.4.B  
EXPNO 10  
PROCNO 1  
Date\_ 20220302  
Time 16.23  
INSTRUM spect  
PROBHD 5 mm QNP 1H/13  
PULPROG zgpg30  
TD 65536  
SOLVENT DMSO  
NS 32  
DS 2  
SWH 6188.119 Hz  
FIDRES 0.004423 Hz  
AQ 5.293367 sec  
RG 228  
DW 80.800 usec  
DE 0.50 usec  
TE 300.0 K  
D1 1.00000000 sec  
TDO 1

===== CHANNEL f1 =====  
NUC1 13C  
P1 18.00 usec  
PL1 -1.00 dB  
PL1W 15.02081871 W  
SFO1 300.2508542 MHz  
SI 32768  
SF 300.2508542 MHz  
WDW EM  
SSB 0  
LB 0.50 Hz  
GB 0  
PC 1.00

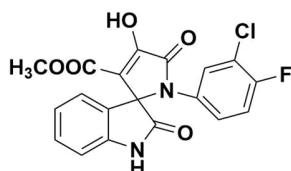

## <sup>13</sup>C NMR Spectra (4b)

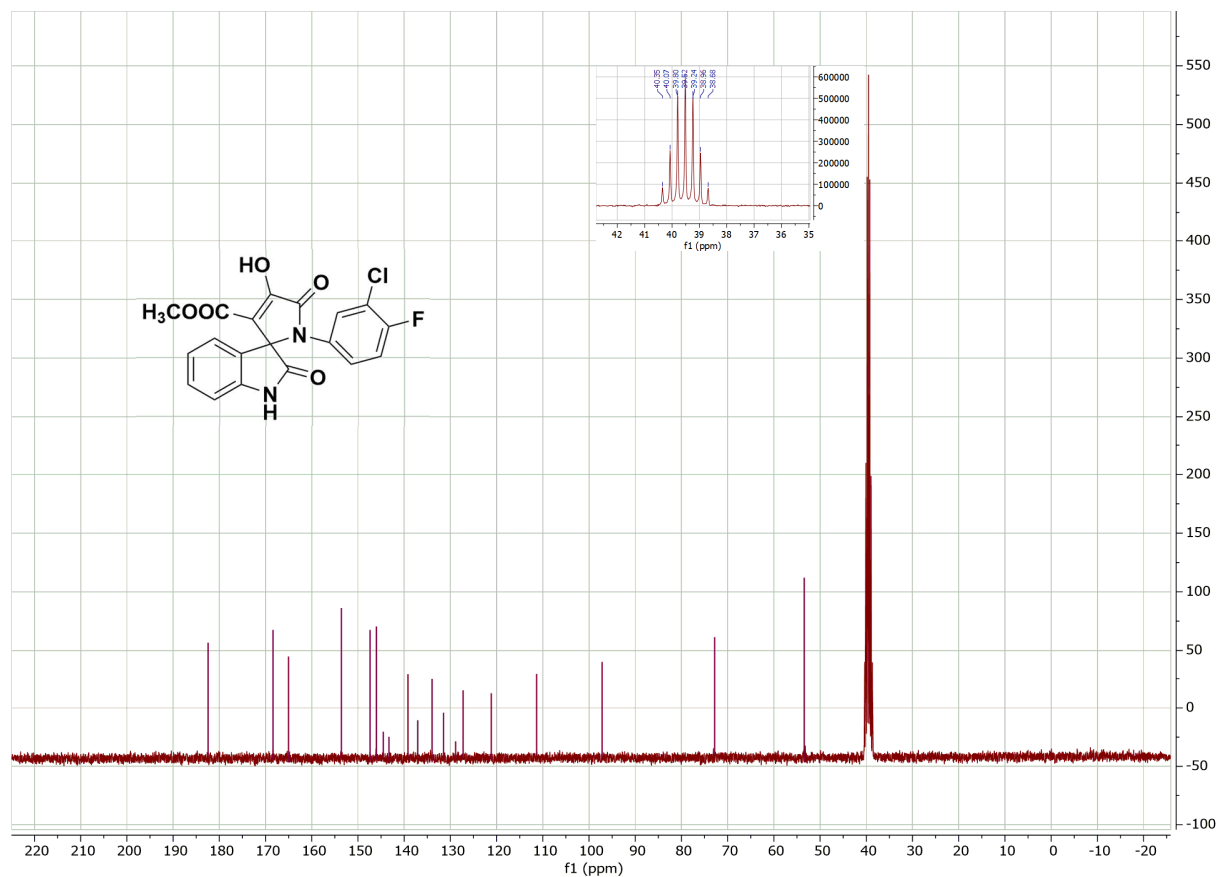

## HRMS (4b)

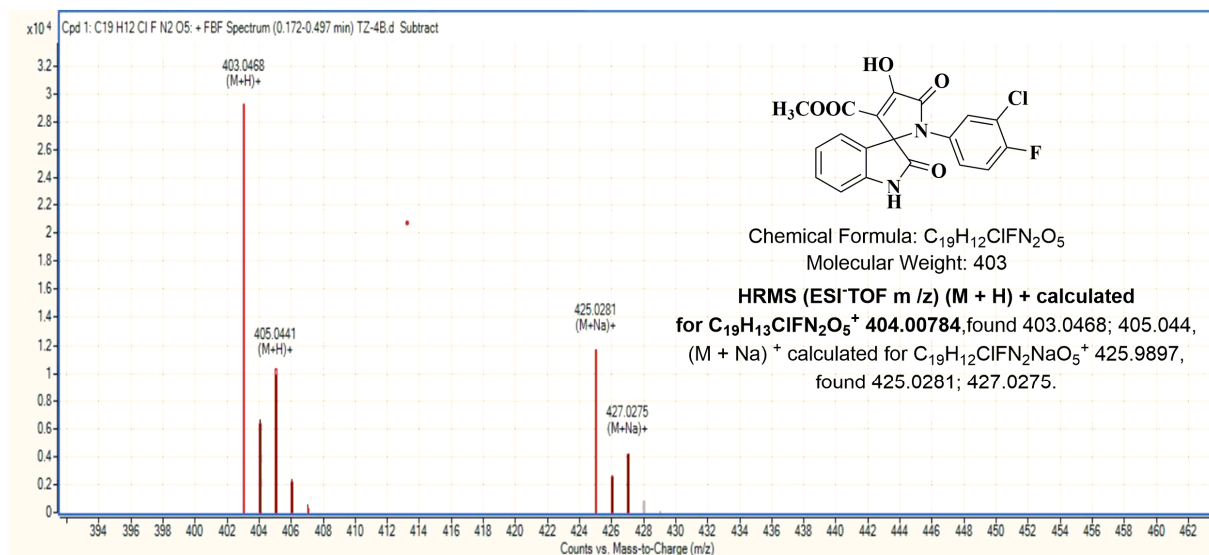

## FT-IR Spectra (4c)

PerkinElmer Spectrum Version 10.03.06  
Tuesday, January 12, 2021 12:04 PM

Analyst  
Date

SAIF,CSIR-CDRI,LKO  
Tuesday, January 12, 2021 12:04 PM

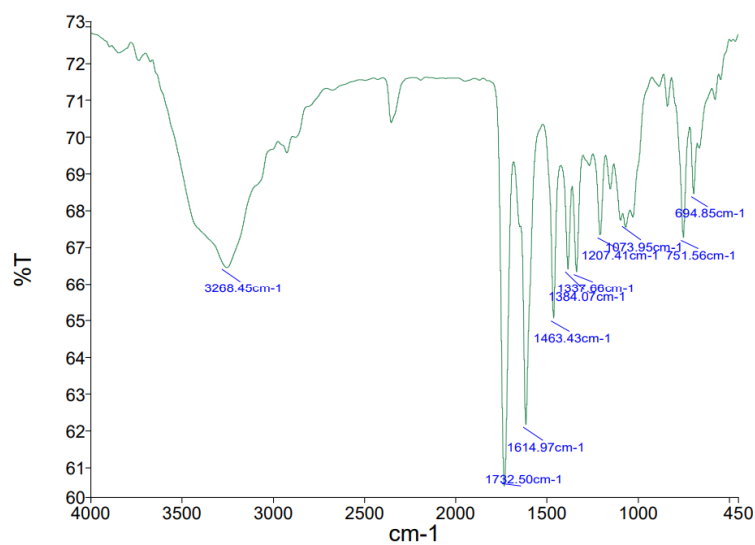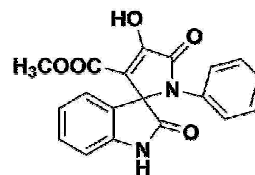

dharmesh 375\_... Sample IR21E12JAN  
08 21011013 H By  
dharmesh Date  
Tuesday, January 12  
2021

**<sup>1</sup>H NMR Spectra (4c)**

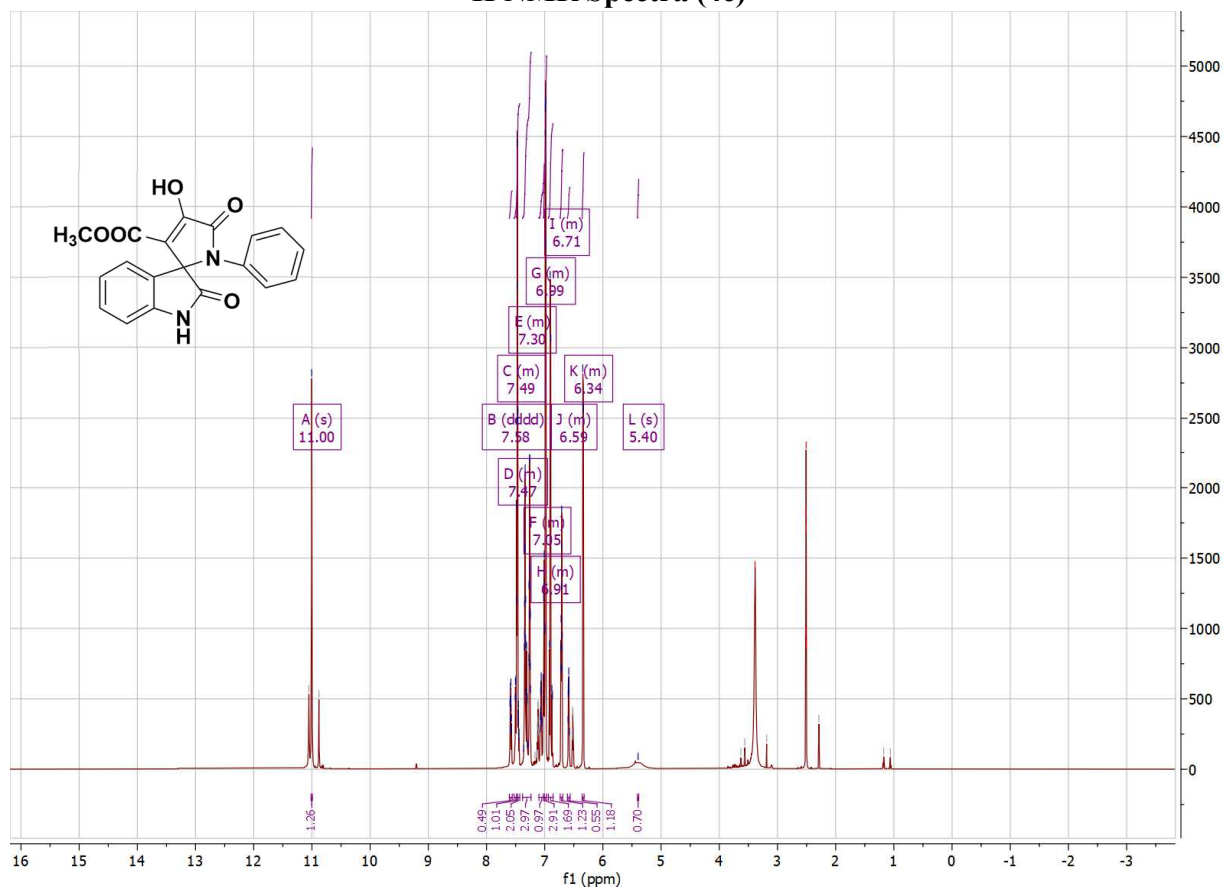

**<sup>13</sup>C NMR Spectra (4c)**

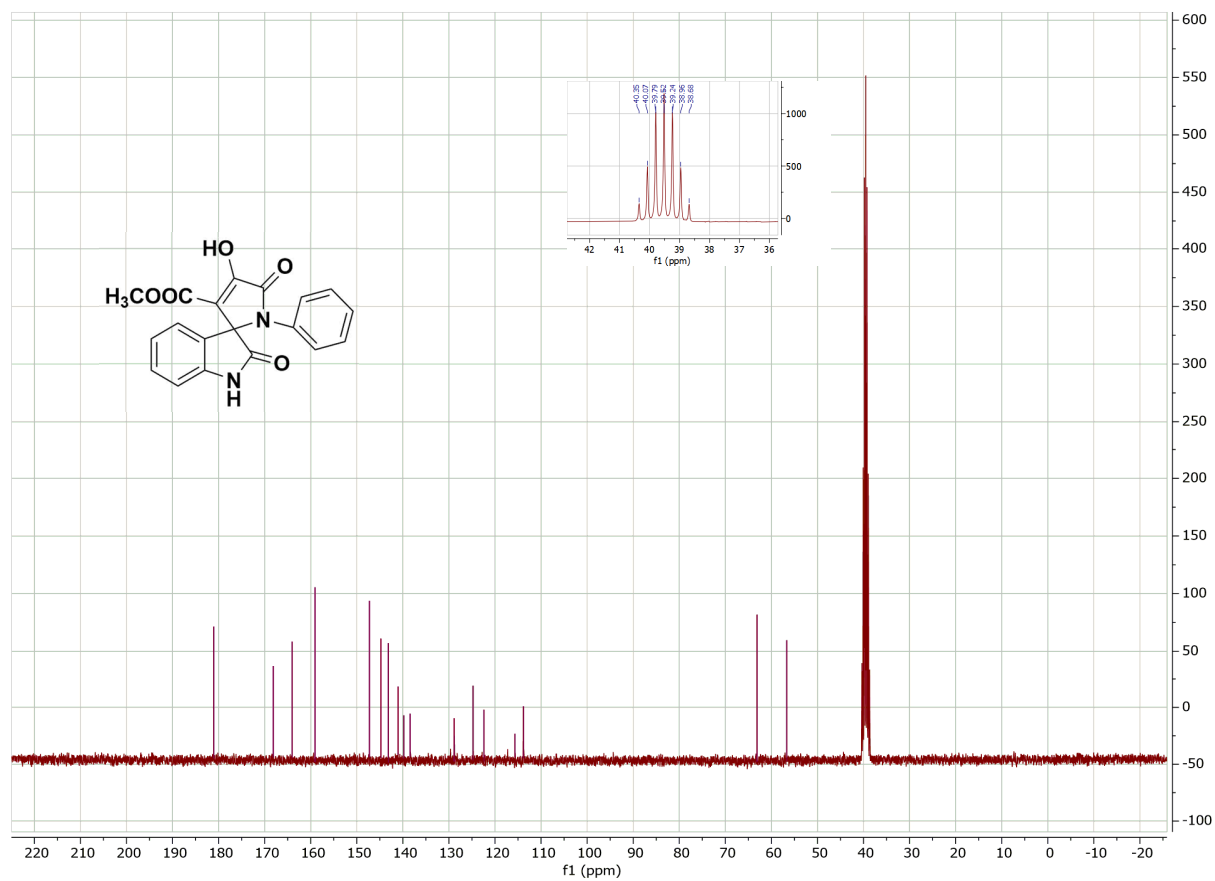

## FT-IR Spectra (4d)

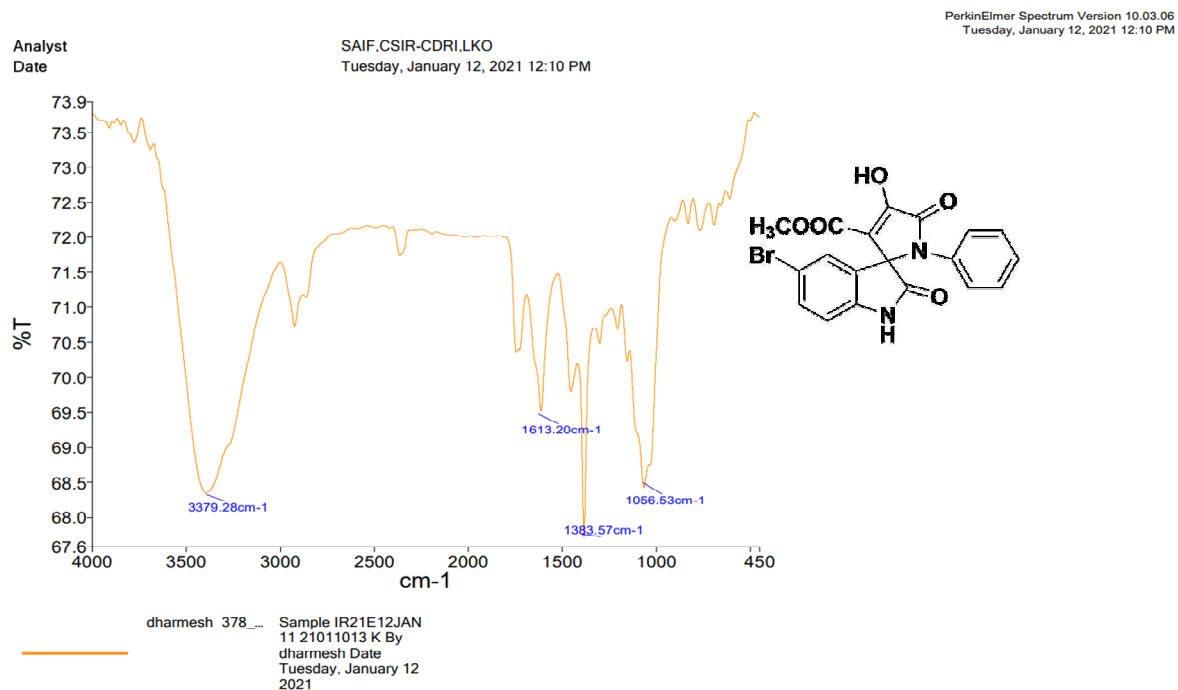

## <sup>1</sup>H NMR Spectra (4d)

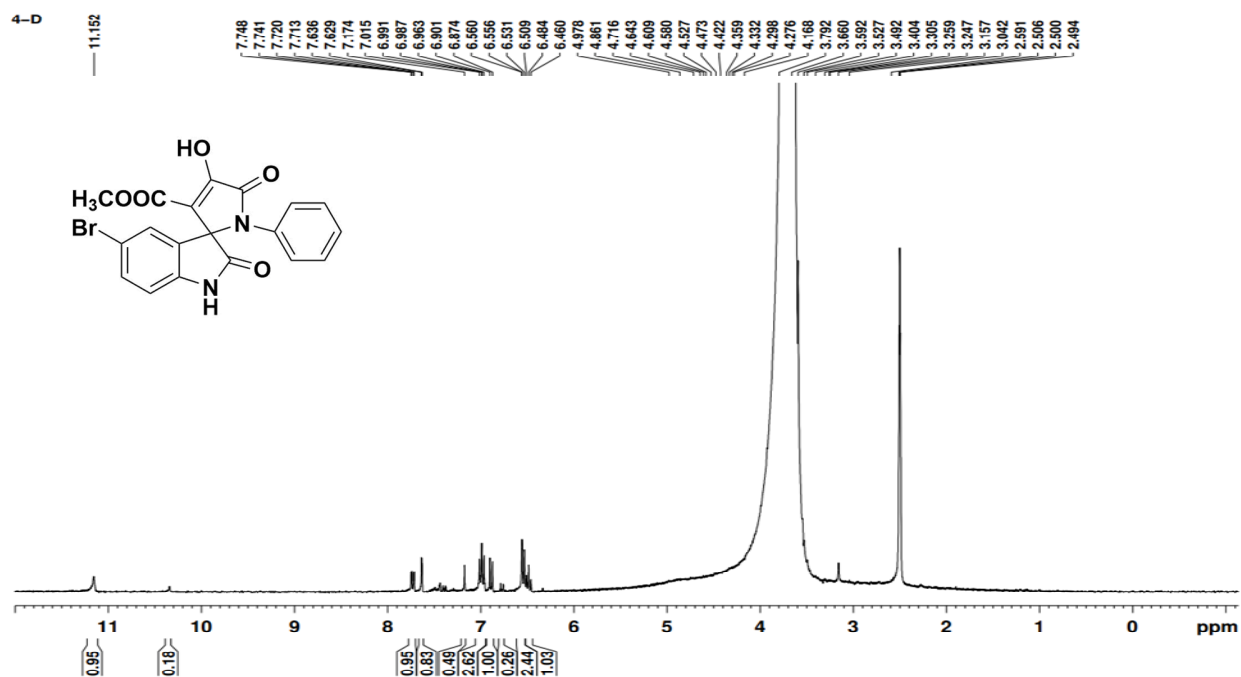



# <sup>13</sup>C NMR Spectra (4d)

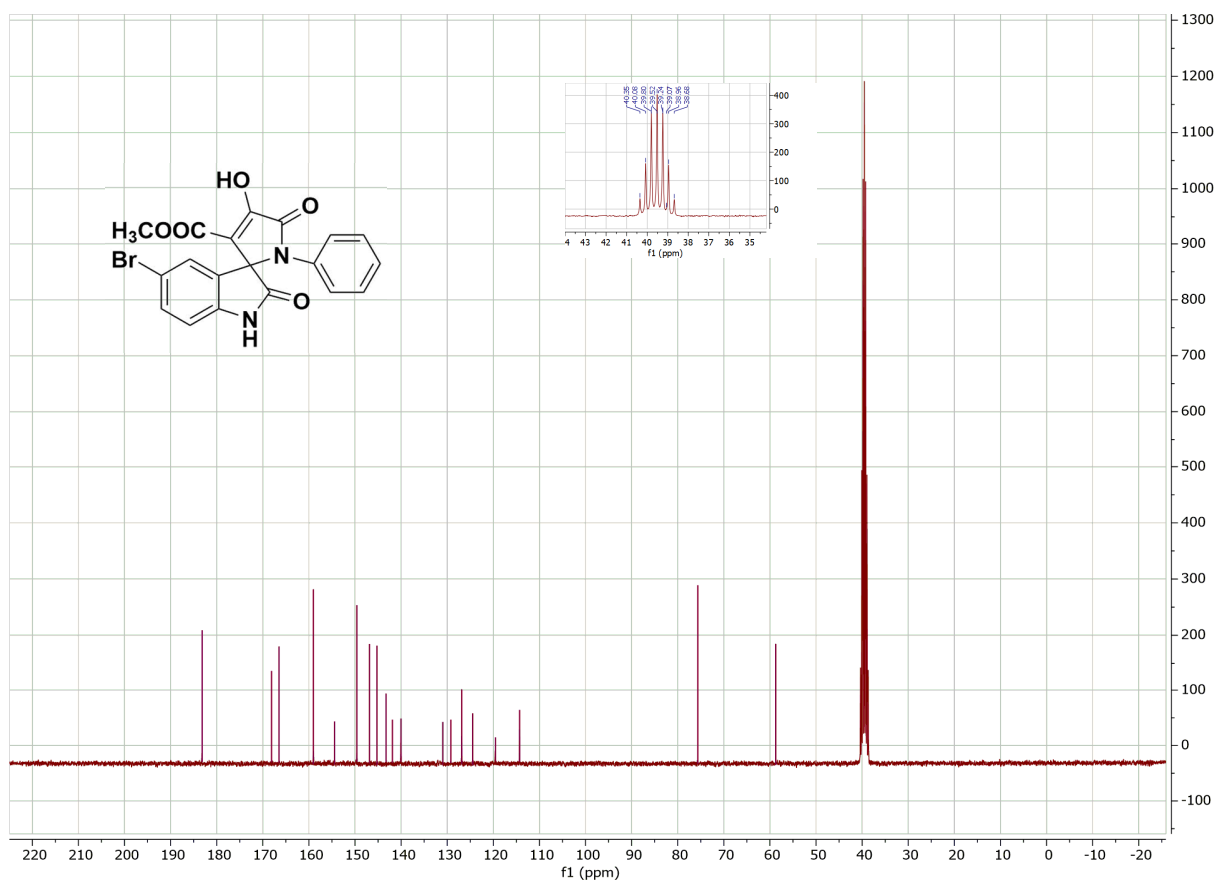

### FT-IR Spectra (4e)

PerkinElmer Spectrum Version 10.03  
Tuesday, January 12, 2021 12:12

Analyst  
Date

SAIF,CSIR-CDRI,LKO  
Tuesday, January 12, 2021 12:12 PM

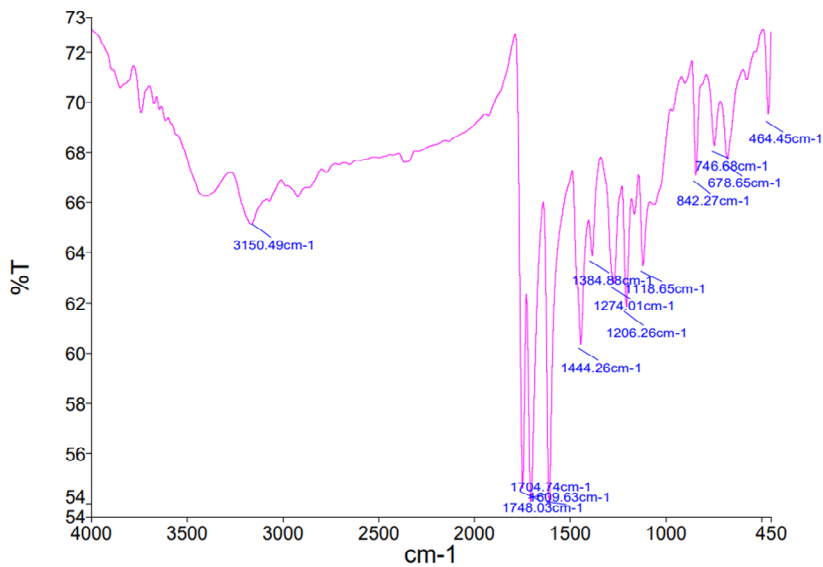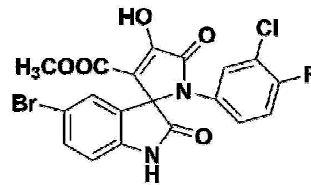

dharmesh 379\_... Sample IR21E12JAN  
12 21011013 L By  
dharmesh Date  
Tuesday, January 12  
2021

### <sup>1</sup>H NMR Spectra (4e)

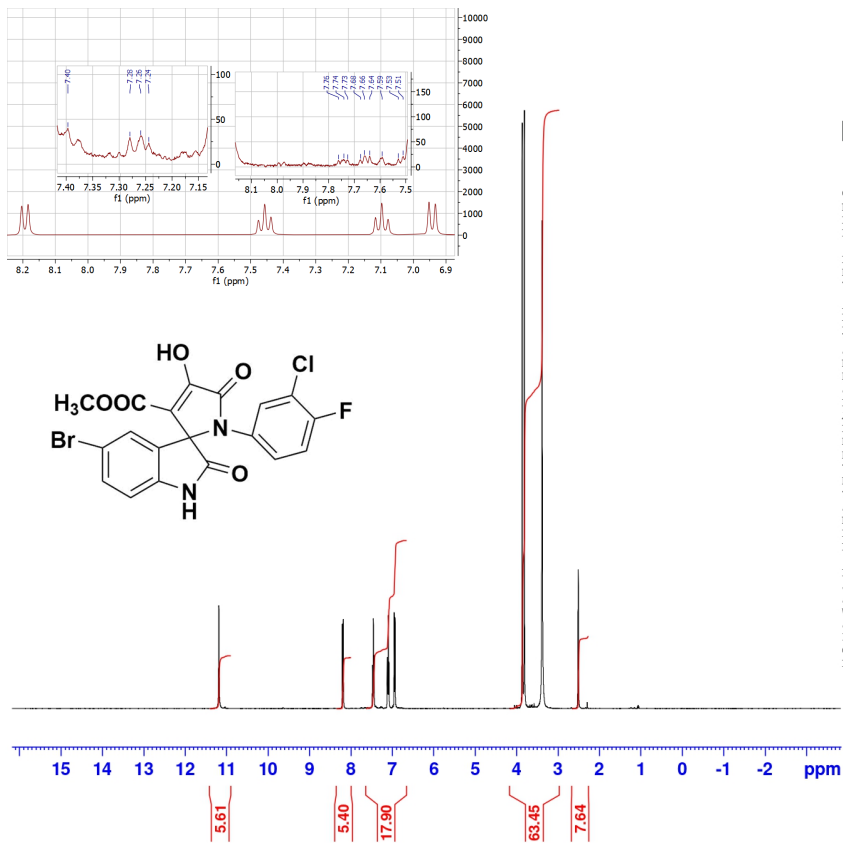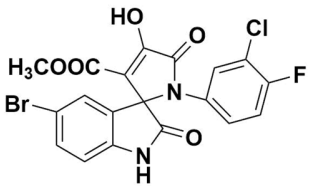

```
Current Data Parameters
NAME          Aug24-2021
EXPNO          50
PROCNO         1
```

```

F2 - Acquisition Parameters
Date_           20210824
Time            20.04 h
INSTRUM         spect
PROBHD          Z114854_0014
PULPROG         zgpg30
TD              65536
SOLVENT         DMSO
NS               9
DS              2
SWH             8012.820 Hz
FIDRES          0.244552 Hz
AQ             4.000465 sec
RG             211.12
DW             62.400 usec
DE             6.50 usec
TE             296.4 K
D1             1.00000000 sec
TD0            1
SF01           400.1324708 MHz
NUC1            1H
P1             12.95 usec
PLWL           14.00000000 W

```

```
F2 - Processing parameters
SI                      65536
SF                      400.1300000 MHz
WDW                      EM
SSB                      0
LB                      0.30 Hz
GB                      0
PC                      1.00
```

# <sup>13</sup>C NMR Spectra (4e)

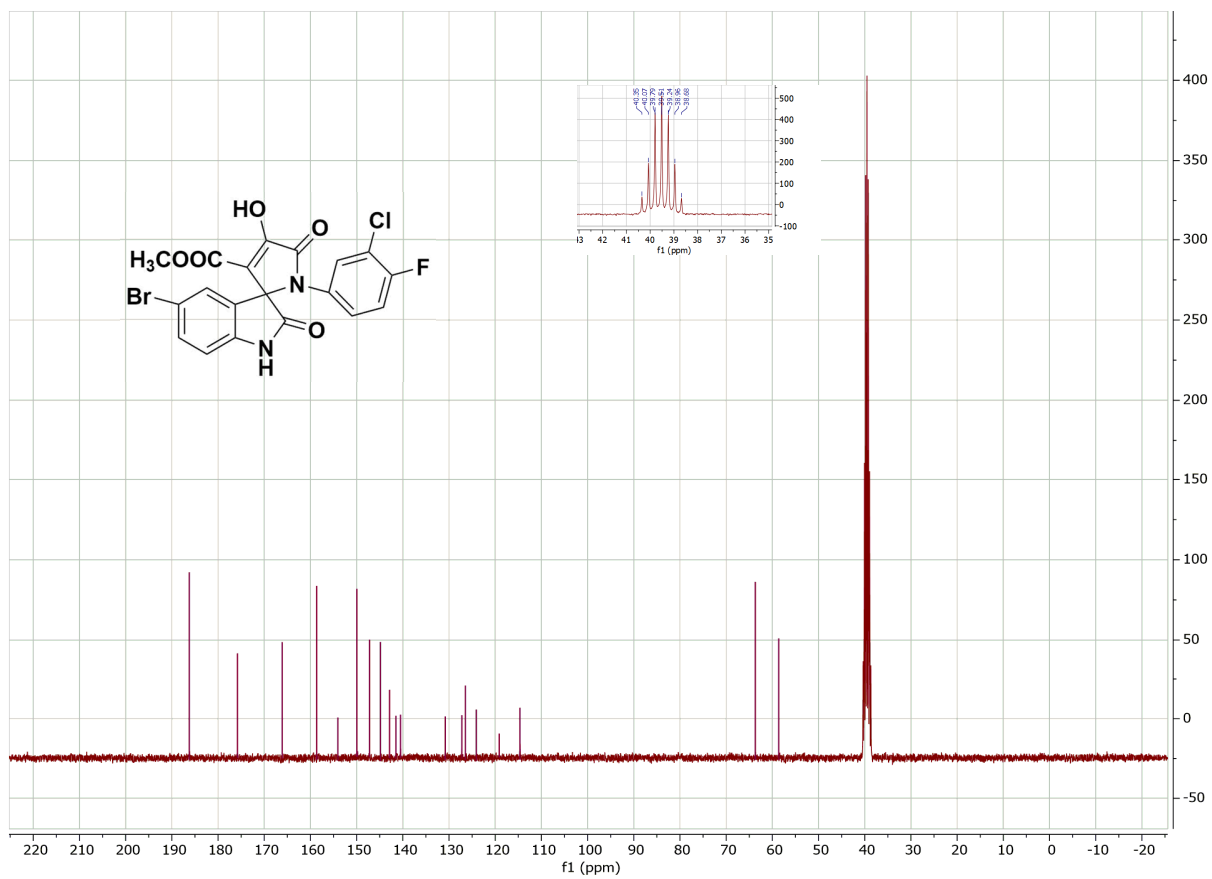

## FT-IR Spectra (4f)

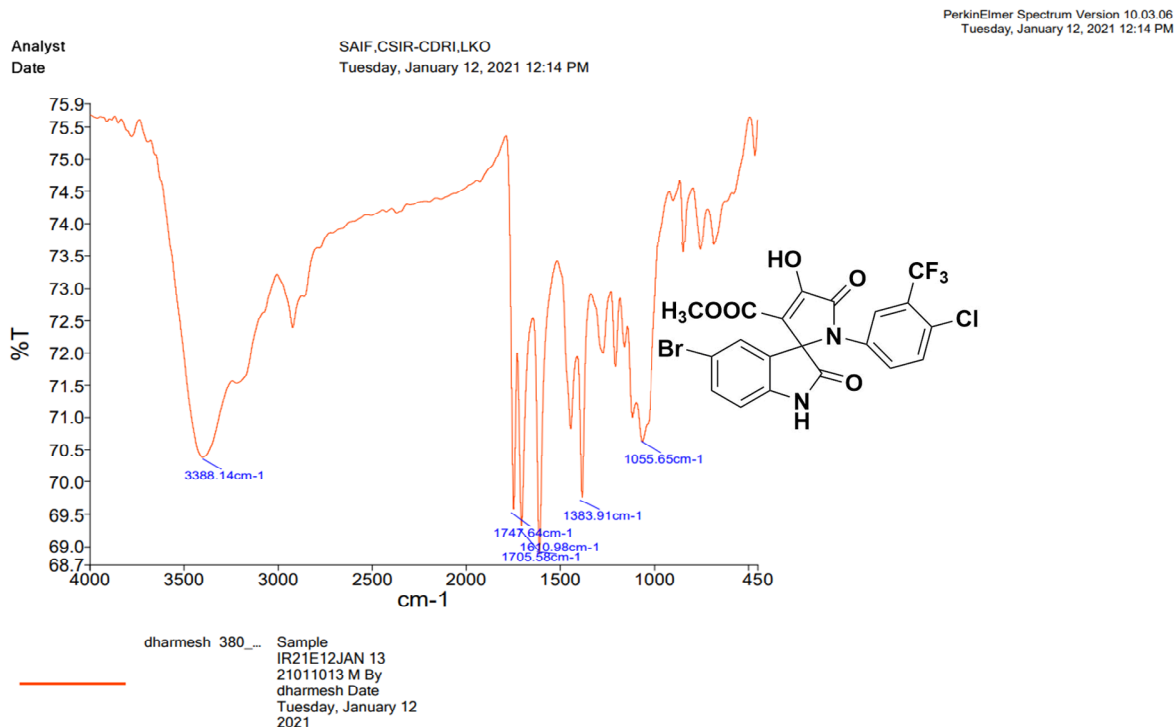

## <sup>13</sup>C NMR Spectra (4f)

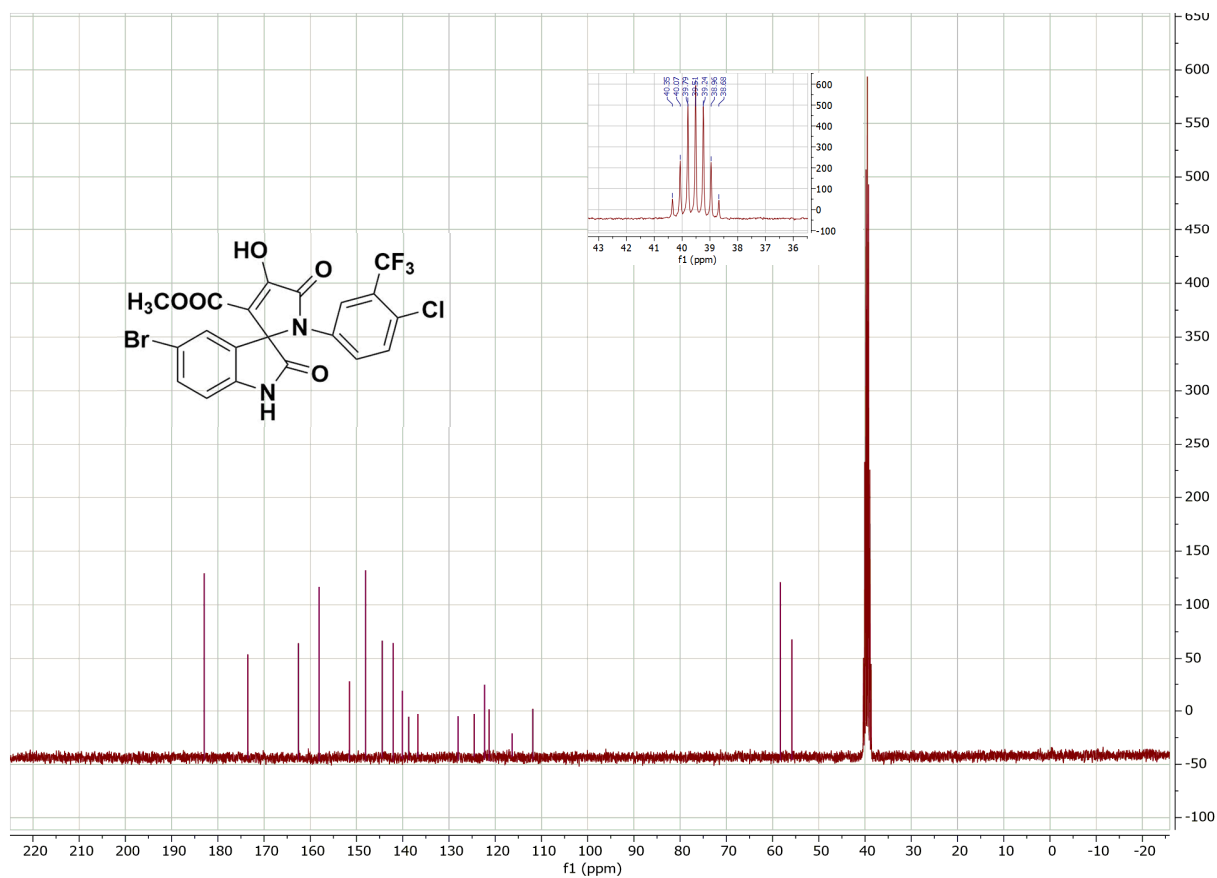

# <sup>1</sup>H NMR Spectra (4f)

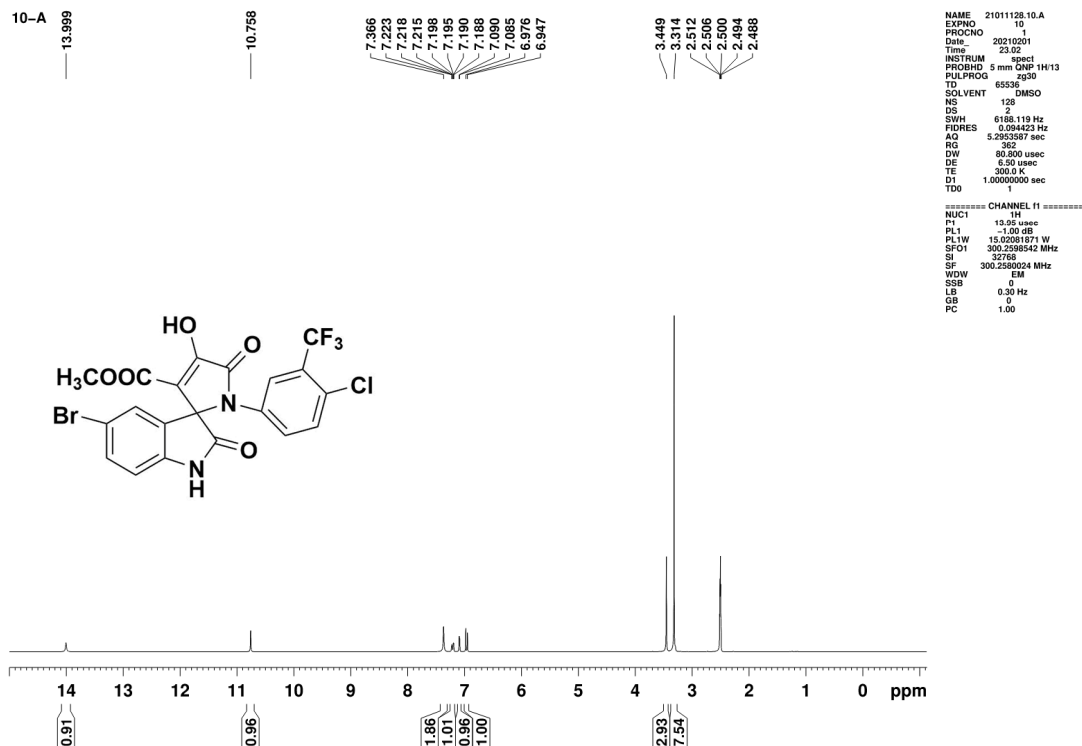

## FT-IR Spectra (4g)

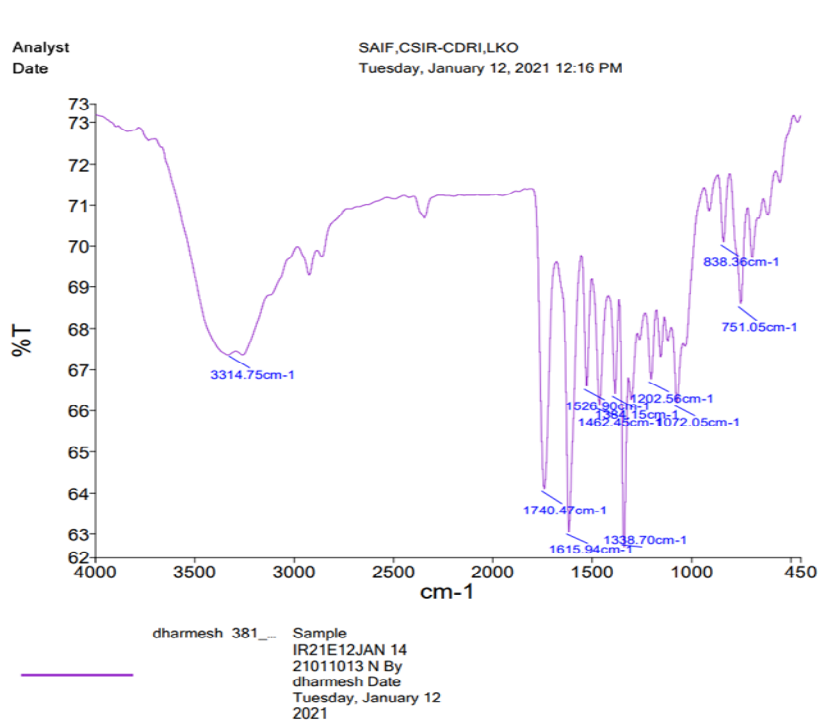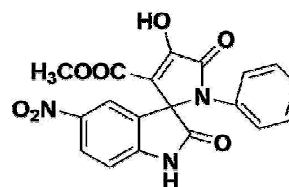

## <sup>13</sup>C NMR Spectra (4g)

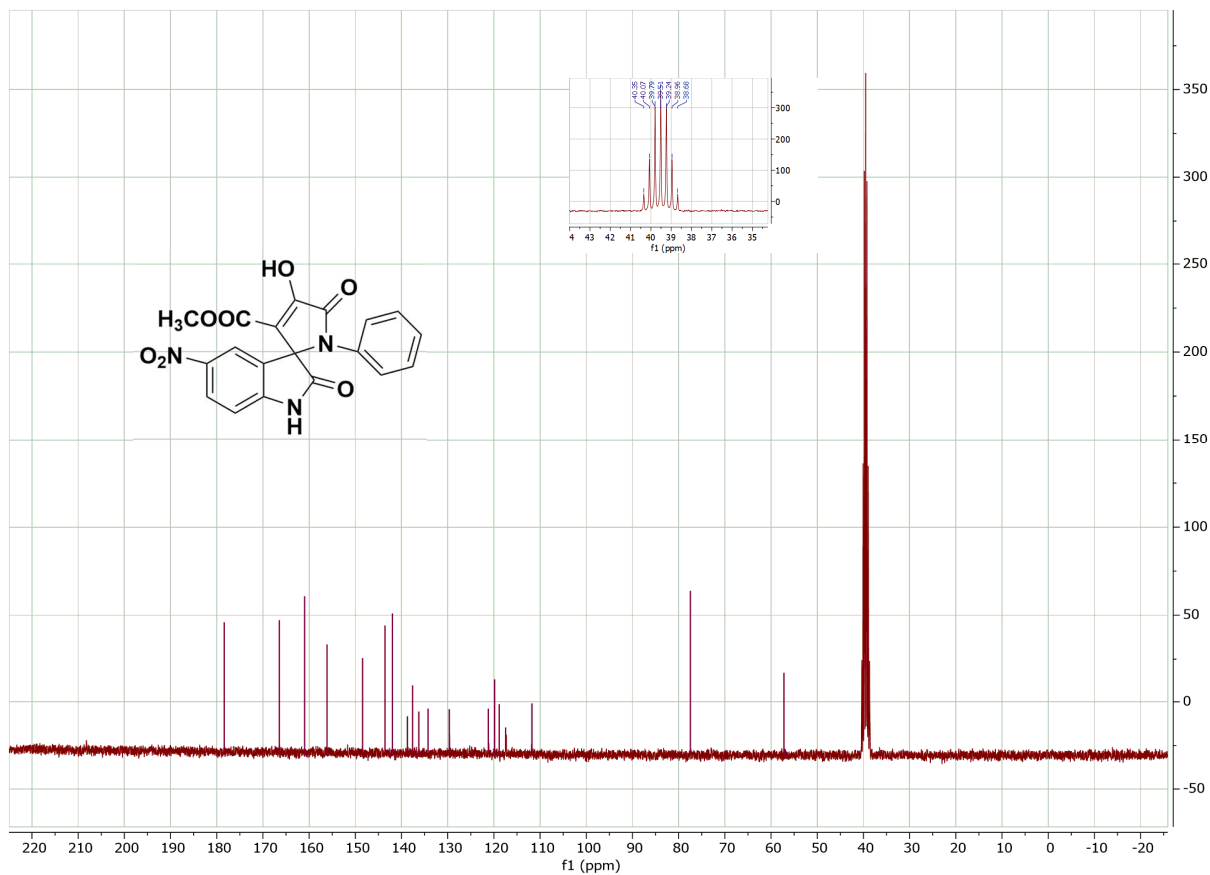

# <sup>1</sup>H NMR Spectra (4g)

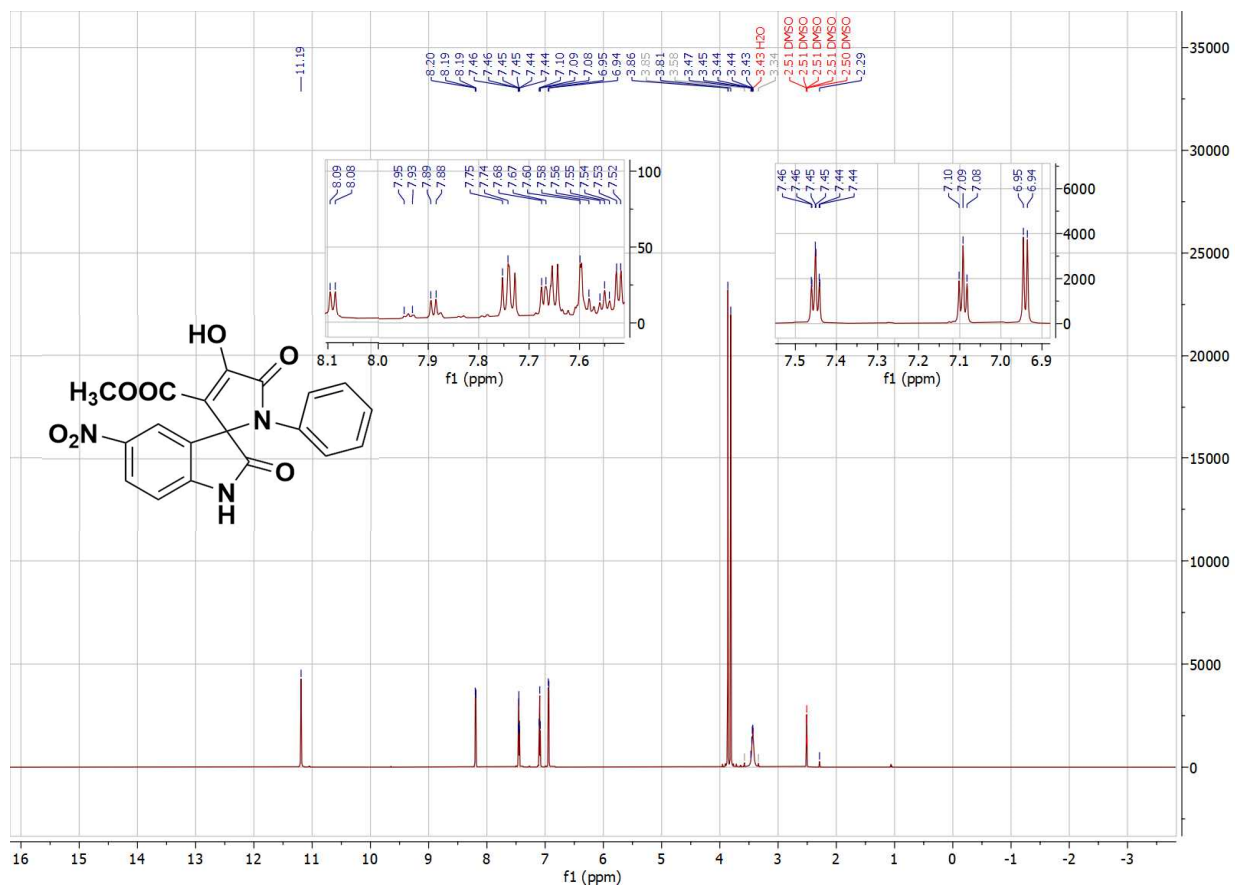

## FT-IR Spectra (4h)

PerkinElmer Spectrum Version 10.03.06  
Tuesday, January 12, 2021 12:18 PM

Analyst  
Date

SAIF,CSIR-CDRI,LKO  
Tuesday, January 12, 2021 12:18 PM

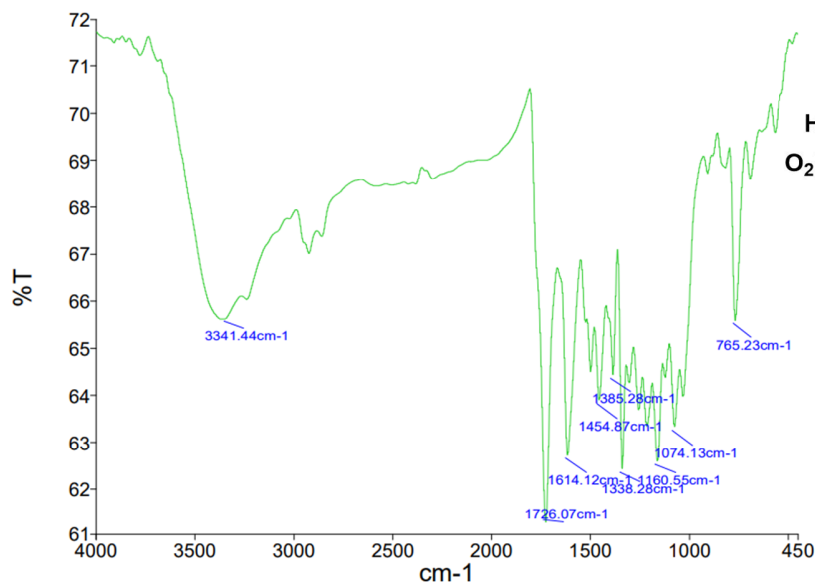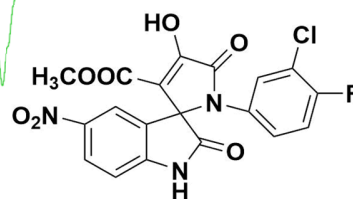

dharmesh 382\_... Sample  
IR21E12JAN 15  
21011013 O By  
dharmesh Date  
Tuesday, January 12  
2021

## <sup>1</sup>H NMR Spectra (4h)

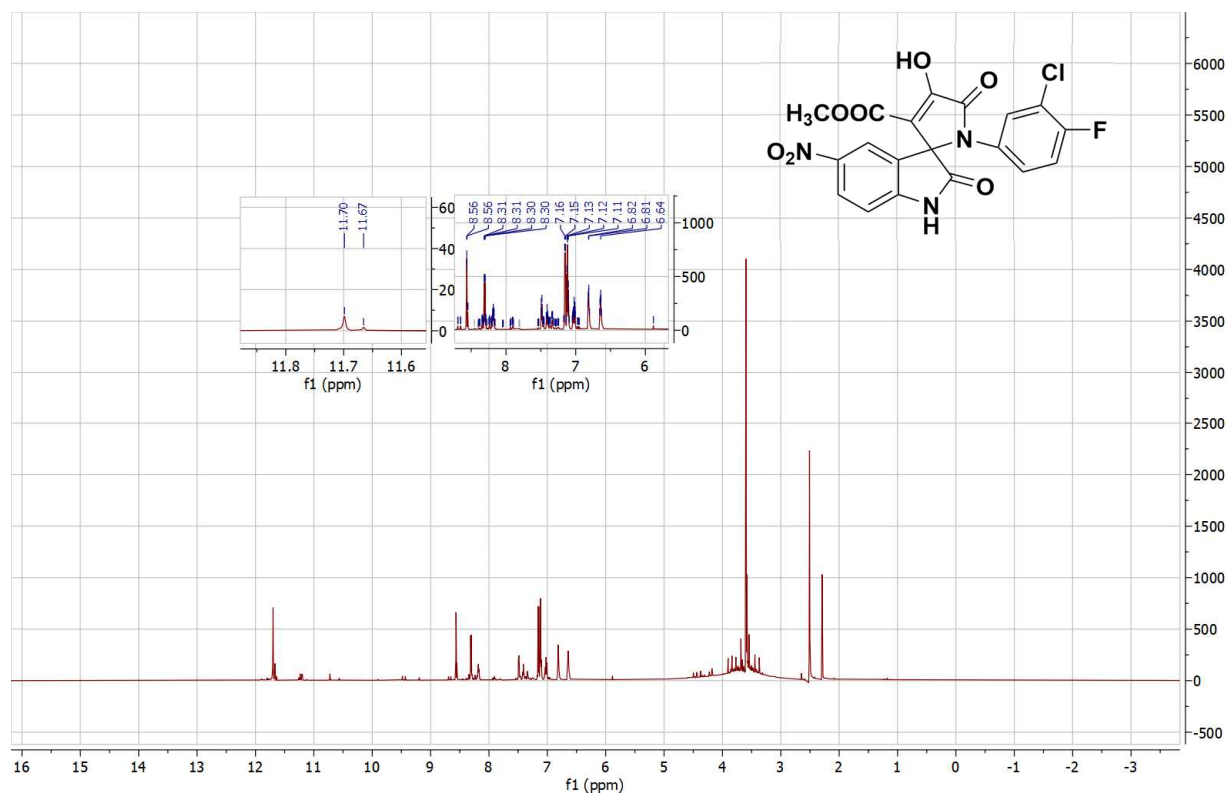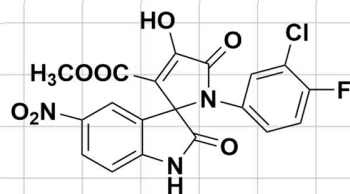



# <sup>13</sup>C NMR Spectra (4h)

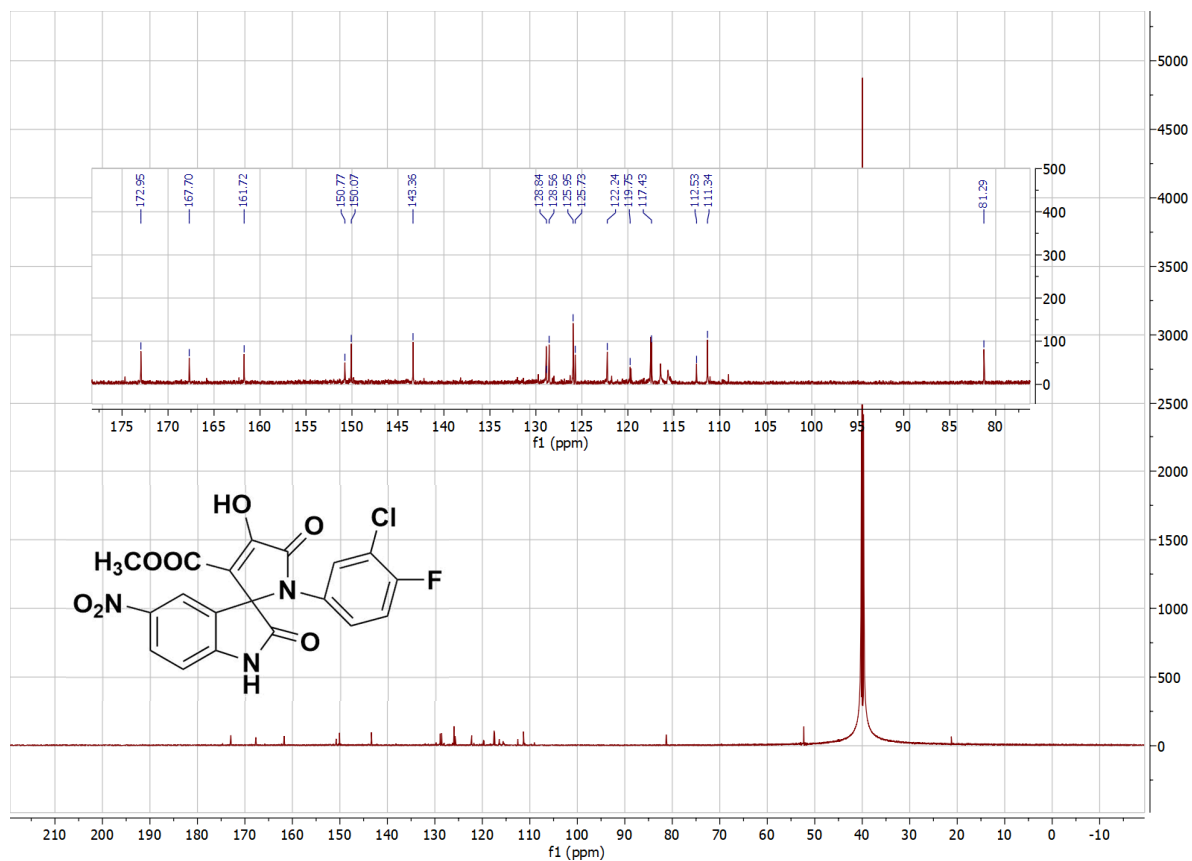

## HRMS (4h)

### Qualitative Analysis Report

|                               |                    |                      |                      |
|-------------------------------|--------------------|----------------------|----------------------|
| <b>Data Filename</b>          | TZ-8-O.d           | <b>Sample Name</b>   | TZ-8-O               |
| <b>Sample Type</b>            | Sample             | <b>Position</b>      | Vial 34              |
| <b>Instrument Name</b>        | Instrument 1       | <b>User Name</b>     |                      |
| <b>Acq Method</b>             | Direct Mass-2017.m | <b>Acquired Time</b> | 2/4/2021 10:32:28 PM |
| <b>IRM Calibration Status</b> | Some Ions Missed   | <b>DA Method</b>     | Default.m            |
| <b>Comment</b>                |                    |                      |                      |

|                       |                             |              |
|-----------------------|-----------------------------|--------------|
| <b>Sample Group</b>   |                             | <b>Info.</b> |
| <b>Acquisition SW</b> | 6200 series TOF/6500 series |              |
| <b>Version</b>        | Q-TOF B.05.00 (B5042.0)     |              |

#### User Chromatograms

Fragmentor Voltage 118 Collision Energy 0 Ionization Mode ESI

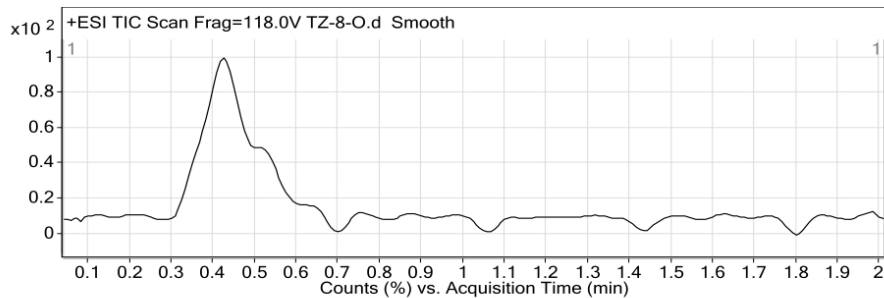

#### User Spectra

Fragmentor Voltage 118 Collision Energy 0 Ionization Mode ESI

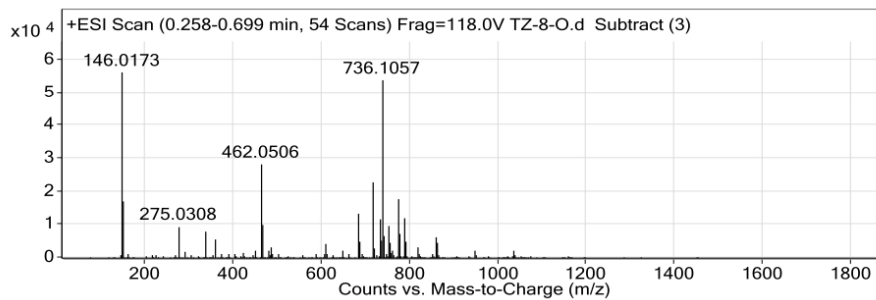

#### Peak List

| m/z      | z | Abund    |
|----------|---|----------|
| 146.0173 | 1 | 56403.63 |
| 148.0143 | 1 | 17375.24 |
| 462.0506 | 1 | 28396.44 |
| 682.0977 | 1 | 13583.08 |
| 714.1237 | 1 | 23047    |
| 736.1057 | 1 | 54071.12 |

## Qualitative Analysis Report

|          |   |          |
|----------|---|----------|
| 737.109  | 1 | 17843.09 |
| 738.1043 | 1 | 20839.02 |
| 773.1971 | 1 | 17944.33 |
| 787.2125 | 1 | 12071.2  |

### Compounds

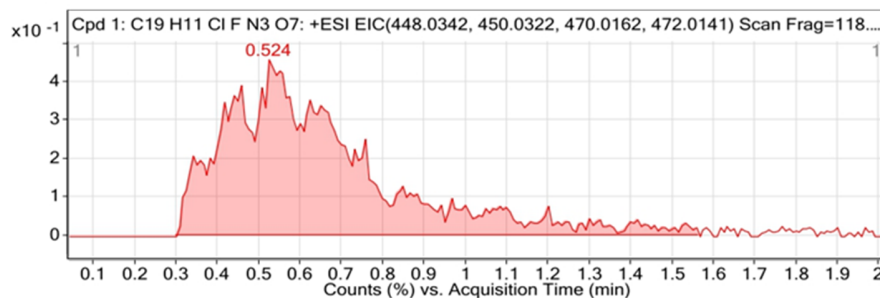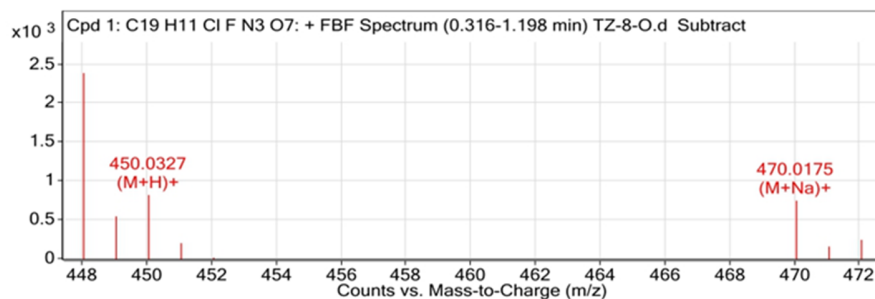

### Peak List

| m/z      | z | Abund   | Formula                                                            | Ion                 |
|----------|---|---------|--------------------------------------------------------------------|---------------------|
| 448.0347 | 1 | 2399.17 | C <sub>19</sub> H <sub>12</sub> ClFN <sub>3</sub> O <sub>7</sub>   | (M+H) <sup>+</sup>  |
| 449.0382 | 1 | 559.81  | C <sub>19</sub> H <sub>12</sub> ClFN <sub>3</sub> O <sub>7</sub>   | (M+H) <sup>+</sup>  |
| 450.0327 | 1 | 834.82  | C <sub>19</sub> H <sub>12</sub> ClFN <sub>3</sub> O <sub>7</sub>   | (M+H) <sup>+</sup>  |
| 451.0342 | 1 | 211.27  | C <sub>19</sub> H <sub>12</sub> ClFN <sub>3</sub> O <sub>7</sub>   | (M+H) <sup>+</sup>  |
| 452.0451 | 1 | 23.47   | C <sub>19</sub> H <sub>12</sub> ClFN <sub>3</sub> O <sub>7</sub>   | (M+H) <sup>+</sup>  |
| 470.0175 | 1 | 762.7   | C <sub>19</sub> H <sub>11</sub> ClFN <sub>3</sub> NaO <sub>7</sub> | (M+Na) <sup>+</sup> |
| 471.0194 | 1 | 165.7   | C <sub>19</sub> H <sub>11</sub> ClFN <sub>3</sub> NaO <sub>7</sub> | (M+Na) <sup>+</sup> |
| 472.014  | 1 | 255.09  | C <sub>19</sub> H <sub>11</sub> ClFN <sub>3</sub> NaO <sub>7</sub> | (M+Na) <sup>+</sup> |

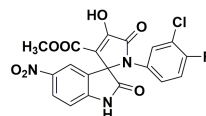

Chemical Formula: C<sub>19</sub>H<sub>11</sub>ClFN<sub>3</sub>O<sub>7</sub>

Molecular Weight: 448

HRMS (ESI-TOF m/z) (M + H)<sup>+</sup> calculated for C<sub>19</sub>H<sub>12</sub>ClFN<sub>3</sub>O<sub>7</sub><sup>+</sup> 449.00784

Found 448.0347; 449.0382; 450.0327; 451.0342; 452.0451

HRMS (ESI-TOF m/z) (M + Na)<sup>+</sup> calculated for C<sub>19</sub>H<sub>11</sub>ClFN<sub>3</sub>NaO<sub>7</sub><sup>+</sup> 470.28976

Found 470.0175; 471.0194; 472.014.

**Supplementary Table S1: Drug-likeness studies of novel SOXs (4a-h).**

| <b>Molecular<br/>descriptors</b> | <b>Novel spirooxindole-pyrrolines</b> |           |           |           |           |           |           |           |
|----------------------------------|---------------------------------------|-----------|-----------|-----------|-----------|-----------|-----------|-----------|
|                                  | <b>4a</b>                             | <b>4b</b> | <b>4c</b> | <b>4d</b> | <b>4e</b> | <b>4f</b> | <b>4g</b> | <b>4h</b> |
| MW                               | 452.77                                | 402.76    | 350.32    | 429.22    | 481.66    | 531.66    | 395.32    | 447.76    |
| HBD                              | 2                                     | 2         | 2         | 2         | 2         | 2         | 2         | 2         |
| HBA                              | 8                                     | 6         | 5         | 5         | 6         | 8         | 7         | 8         |
| LogP                             | 2.37                                  | 2.2       | 1.92      | 2.2       | 2.48      | 2.91      | 1.48      | 1.64      |
| TPSA (Å <sup>2</sup> )           | 95.94                                 | 95.94     | 95.94     | 95.94     | 95.94     | 95.94     | 141.76    | 141.76    |
| Rotatable bonds (RB)             | 4                                     | 3         | 3         | 3         | 3         | 4         | 4         | 4         |
| Lipinski's violations            | 0                                     | 0         | 0         | 0         | 0         | 1         | 0         | 0         |
| Veber's violations               | 0                                     | 0         | 0         | 0         | 0         | 0         | 1         | 1         |

**Supplementary Table S2:ADME indices of novel SOXs (4a-h).**

| S.N. | Compounds          | Aq. Solubility<br>(mg/L) | BBB (C. Brain/C.<br>Blood | Caco2 cell<br>permeability (nm/sec) | MDCK cell<br>Permeability (nm/sec) | Skin permeability<br>(logKp; cm/h) | PPB (%) | HIA (%) | CYT. p450 2D6<br>inhibition | CYT. p450 2D6<br>substrate |
|------|--------------------|--------------------------|---------------------------|-------------------------------------|------------------------------------|------------------------------------|---------|---------|-----------------------------|----------------------------|
| 1.   | <b>4a</b>          | 3.629                    | 0.154                     | 20.206                              | 1.371                              | -2.810                             | 92.007  | 94.745  | Non                         | Non                        |
| 2.   | <b>4b</b>          | 7.049                    | 0.105                     | 20.858                              | 3.232                              | -4.233                             | 89.411  | 94.685  | Non                         | Non                        |
| 3.   | <b>4c</b>          | 100.057                  | 0.420                     | 20.861                              | 9.255                              | -4.023                             | 91.875  | 94.290  | Non                         | Non                        |
| 4.   | <b>4d</b>          | 9.505                    | 0.623                     | 19.630                              | 0.896                              | -3.932                             | 92.326  | 94.896  | Non                         | Non                        |
| 5.   | <b>4e</b>          | 0.653                    | 0.212                     | 19.921                              | 0.380                              | -4.167                             | 91.158  | 95.430  | Non                         | Non                        |
| 6.   | <b>4f</b>          | 0.330                    | 0.364                     | 19.869                              | 0.155                              | -2.723                             | 91.983  | 95.580  | Non                         | Non                        |
| 7.   | <b>4g</b>          | 24.282                   | 0.109                     | 21.090                              | 1.409                              | -4.032                             | 90.939  | 81.852  | Non                         | Non                        |
| 8.   | <b>4h</b>          | 1.685                    | 0.013                     | 19.275                              | 0.458                              | -4.216                             | 92.711  | 90.0635 | Non                         | Non                        |
| 9.   | <b>Doxorubicin</b> | 112.691                  | 0.032                     | 17.726                              | 1.023                              | -4.698                             | 32.789  | 31.9529 | Non                         | Non                        |

\*Plasma protein binding (PPB); Blood brain barrier (BBB); Human intestinal absorption (HIA)
